# Supplementary material for: Gene Family Analysis of the Arabidopsis NF-YA Transcription Factors Reveals Opposing Abscisic Acid Responses During Seed Germination
Source: Plant Mol Biol Report. 2014 Feb 25;32(5):971–86. doi: 10.1007/s11105-014-0704-6 (PMC4149875; doi:10.1007/s11105-014-0704-6)
Supplement: Supplementary file 1 — (PDF 2365 kb) [file 11105_2014_704_MOESM1_ESM.pdf]

## Supplementary data for

### Overexpression of the *Arabidopsis* NF-YA transcription factor family leads to opposing abscisic acid responses during seed germination

Chamindika L. Siriwardana, Roderick W. Kumimoto, Daniel Jones, and \*Ben F. Holt III

\*Corresponding author. e-mail. benholt@ou.edu

#### This file includes:

**Table S1** List of homozygous and hemizygous *p35S::NF-YA* plant lines.

**Fig. S1** Multiple sequence alignment of the *Arabidopsis* NF-YA.

**Fig. S2** Identity matrix for the *Arabidopsis* NF-YA.

**Fig. S3** Quantification of growth defects in *p35S::NF-YA* plant lines.

**Fig. S4** Characterization of cotyledon-like leaves in *p35S::NF-YA5*.

**Fig. S5** Abiotic stress responses of *p35S::NF-YA5*.

**Fig. S6** Confirmation of nuclear localization for NF-YA proteins.

**Fig. S7** ABA responses during root elongation.

**Fig. S8** Publically available microarray data for the expression of *NF-YA* genes in seeds.

**Fig. S9** *NF-YA8* and *NF-YA9* expression in *p35S::NF-YA8* and *p35S::NF-YA9* seeds.

**Fig. S10** ABA-induction of gene expression in *NF-YA* overexpressors.

**Table S1** List of homozygous and hemizygous *p35S::NF-YA* plant lines.

| <b>AGI#</b>      | <b>Construct</b>            | <b>Plant line#</b> | <b>Homozygous or Hemizygous</b> |
|------------------|-----------------------------|--------------------|---------------------------------|
| <b>At5g12840</b> | <i>p35S::NF-YA1-CFP/HA</i>  | 1                  | Homozygous                      |
|                  |                             | 2                  | Homozygous                      |
| <b>At3g05690</b> | <i>p35S::NF-YA2-CFP/HA</i>  | 1                  | Homozygous                      |
|                  |                             | 2                  | Homozygous                      |
| <b>At1g72830</b> | <i>p35S::NF-YA3-CFP/HA</i>  | 1                  | Homozygous                      |
|                  |                             | 2                  | Homozygous                      |
| <b>At2g34720</b> | <i>p35S::NF-YA4-CFP/HA</i>  | 1                  | Homozygous                      |
|                  |                             | 2                  | Hemizygous                      |
| <b>At1g54160</b> | <i>p35S::NF-YA5-CFP/HA</i>  | 1                  | Hemizygous                      |
|                  |                             | 2                  | Hemizygous                      |
| <b>At3g14020</b> | <i>p35S::NF-YA6-CFP/HA</i>  | 1                  | Hemizygous                      |
|                  |                             | 2                  | Hemizygous                      |
| <b>At1g30500</b> | <i>p35S::NF-YA7-CFP/HA</i>  | 1                  | Homozygous                      |
|                  |                             | 2                  | Homozygous                      |
| <b>At1g17590</b> | <i>p35S::NF-YA8-CFP/HA</i>  | 1                  | Homozygous                      |
|                  |                             | 2                  | Homozygous                      |
| <b>At3g20910</b> | <i>p35S::NF-YA9-CFP/HA</i>  | 1                  | Homozygous                      |
|                  |                             | 2                  | Homozygous                      |
| <b>At5g06510</b> | <i>p35S::NF-YA10-CFP/HA</i> | 1                  | Hemizygous                      |
|                  |                             | 2                  | Homozygous                      |



**a**

|           | AtNF-YA2 | AtNF-YA10 | AtNF-YA1 | AtNF-YA9 | AtNF-YA5 | AtNF-YA6 | AtNF-YA3 | AtNF-YA8 | AtNF-YA4 | AtNF-YA7 | HsNF-YA |
|-----------|----------|-----------|----------|----------|----------|----------|----------|----------|----------|----------|---------|
| AtNF-YA2  |          | 63.2%     | 23.0%    | 24.0%    | 22.3%    | 21.4%    | 21.6%    | 19.4%    | 27.7%    | 26.5%    | 19.6%   |
| AtNF-YA10 | 63.2%    |           | 21.5%    | 20.9%    | 18.8%    | 18.5%    | 20.6%    | 18.5%    | 27.5%    | 27.0%    | 20.2%   |
| AtNF-YA1  | 23.0%    | 21.5%     |          | 41.6%    | 22.2%    | 18.8%    | 22.4%    | 20.0%    | 26.8%    | 28.6%    | 20.4%   |
| AtNF-YA9  | 24.0%    | 20.9%     | 41.6%    |          | 22.8%    | 25.0%    | 23.1%    | 21.8%    | 29.8%    | 31.0%    | 20.3%   |
| AtNF-YA5  | 22.3%    | 18.8%     | 22.2%    | 22.8%    |          | 56.3%    | 34.4%    | 33.7%    | 30.5%    | 32.1%    | 21.3%   |
| AtNF-YA6  | 21.4%    | 18.5%     | 18.8%    | 25.0%    | 56.3%    |          | 35.9%    | 33.7%    | 30.1%    | 30.6%    | 18.6%   |
| AtNF-YA3  | 21.6%    | 20.6%     | 22.4%    | 23.1%    | 34.4%    | 35.9%    |          | 63.9%    | 33.3%    | 33.0%    | 21.3%   |
| AtNF-YA8  | 19.4%    | 18.5%     | 20.0%    | 21.8%    | 33.7%    | 33.7%    | 63.9%    |          | 32.3%    | 31.5%    | 19.7%   |
| AtNF-YA4  | 27.7%    | 27.5%     | 26.8%    | 29.8%    | 30.5%    | 30.1%    | 33.3%    | 32.3%    |          | 64.5%    | 23.0%   |
| AtNF-YA7  | 26.5%    | 27.0%     | 28.6%    | 31.0%    | 32.1%    | 30.6%    | 33.0%    | 31.5%    | 64.5%    |          | 25.7%   |
| HsNF-YA   | 19.6%    | 20.2%     | 20.4%    | 20.3%    | 21.3%    | 18.6%    | 21.3%    | 19.7%    | 23.0%    | 25.7%    |         |

**b**

|           | AtNF-YA1 | AtNF-YA9 | AtNF-YA4 | AtNF-YA7 | AtNF-YA3 | AtNF-YA8 | AtNF-YA5 | AtNF-YA6 | AtNF-YA2 | AtNF-YA10 | HsNF-YA |
|-----------|----------|----------|----------|----------|----------|----------|----------|----------|----------|-----------|---------|
| AtNF-YA1  |          | 78.9%    | 64.9%    | 70.2%    | 66.7%    | 64.9%    | 70.2%    | 66.7%    | 57.4%    | 63.2%     | 64.9%   |
| AtNF-YA9  | 78.9%    |          | 71.9%    | 77.2%    | 73.7%    | 75.4%    | 73.7%    | 75.4%    | 59.0%    | 63.2%     | 68.4%   |
| AtNF-YA4  | 64.9%    | 71.9%    |          | 86.0%    | 74.1%    | 75.9%    | 74.1%    | 72.4%    | 61.3%    | 63.8%     | 63.8%   |
| AtNF-YA7  | 70.2%    | 77.2%    | 86.0%    |          | 75.9%    | 77.6%    | 77.6%    | 75.9%    | 61.3%    | 63.8%     | 65.5%   |
| AtNF-YA3  | 66.7%    | 73.7%    | 74.1%    | 75.9%    |          | 93.1%    | 82.8%    | 81.0%    | 64.5%    | 63.8%     | 63.8%   |
| AtNF-YA8  | 64.9%    | 75.4%    | 75.9%    | 77.6%    | 93.1%    |          | 86.2%    | 84.5%    | 61.3%    | 60.3%     | 65.5%   |
| AtNF-YA5  | 70.2%    | 73.7%    | 74.1%    | 77.6%    | 82.8%    | 86.2%    |          | 91.4%    | 64.5%    | 63.8%     | 67.2%   |
| AtNF-YA6  | 66.7%    | 75.4%    | 72.4%    | 75.9%    | 81.0%    | 84.5%    | 91.4%    |          | 61.3%    | 60.3%     | 65.5%   |
| AtNF-YA2  | 57.4%    | 59.0%    | 61.3%    | 61.3%    | 64.5%    | 61.3%    | 64.5%    | 61.3%    |          | 83.9%     | 51.6%   |
| AtNF-YA10 | 63.2%    | 63.2%    | 63.8%    | 63.8%    | 63.8%    | 60.3%    | 63.8%    | 60.3%    | 83.9%    |           | 55.2%   |
| HsNF-YA   | 64.9%    | 68.4%    | 63.8%    | 65.5%    | 63.8%    | 65.5%    | 67.2%    | 65.5%    | 51.6%    | 55.2%     |         |

**Fig. S2** Identity matrix of the NF-YA proteins. a) Full-length protein. b) Conserved domain. At, *Arabidopsis thaliana*; Hs, *Homo sapiens*. Note that pairs of Arabidopsis NF-YA paralogs demonstrate high identity across the full-length protein sequence and the conserved domain.

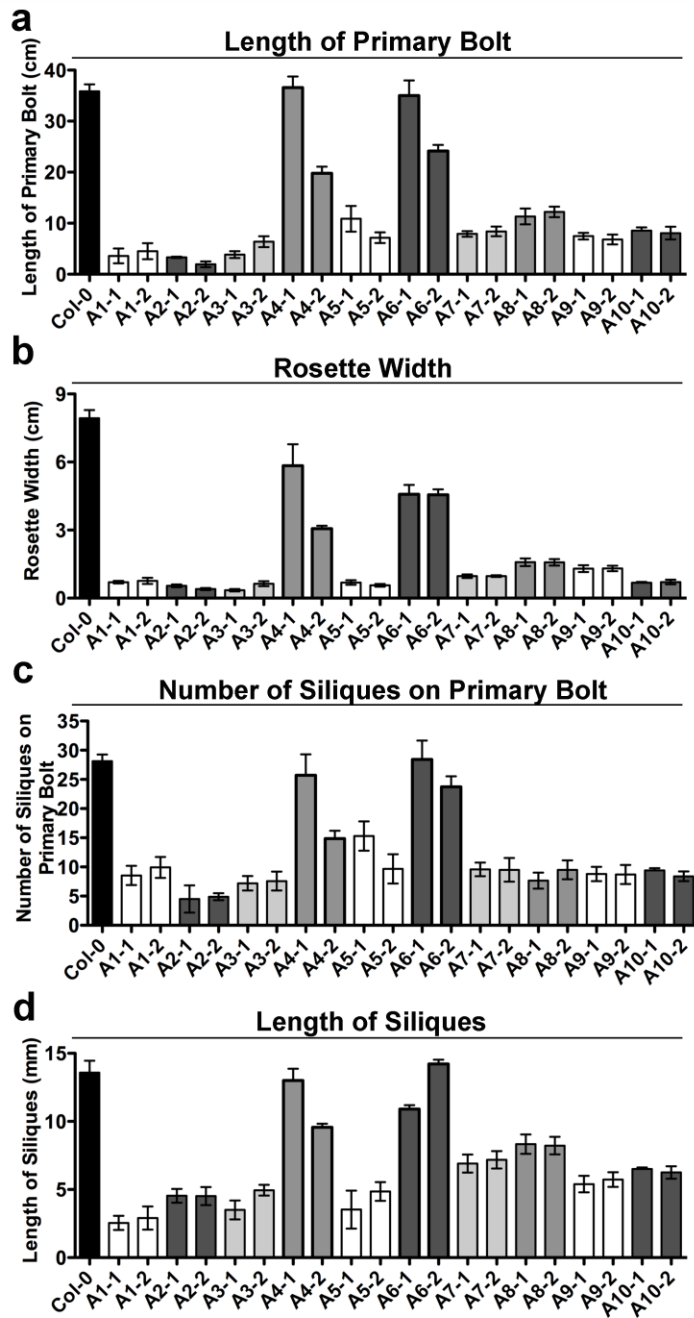

**Fig. S3** Overexpression of the *NF-YA* gene family leads to growth defects. Quantitative measurements of (a) plant height (b) rosette width (c) number of siliques on primary bolt (d) length of siliques.

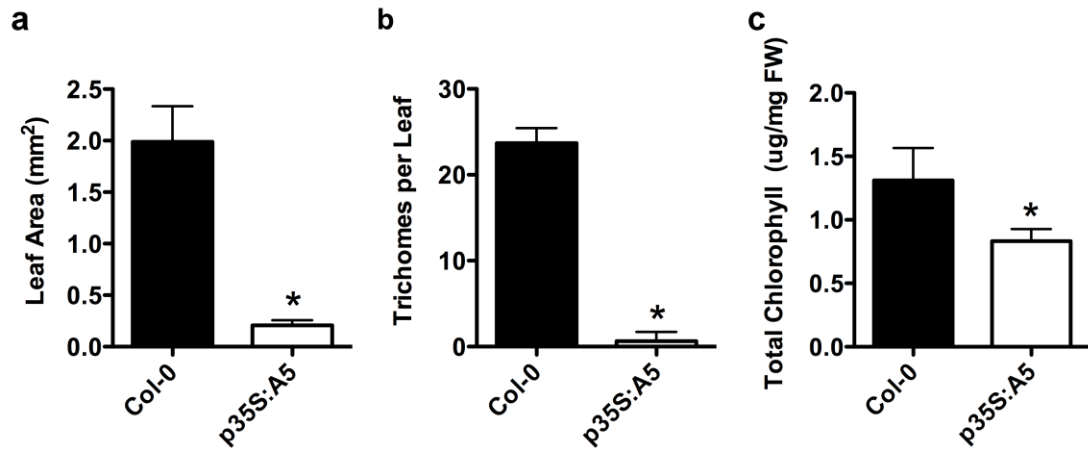

**Fig. S4** Quantifications of the cotyledon-like leaves in *p35S::NF-YA5*. (a) Leaf area (b) number of trichomes (c) chlorophyll content. Asterisks represent significant differences derived from Student's t-tests.

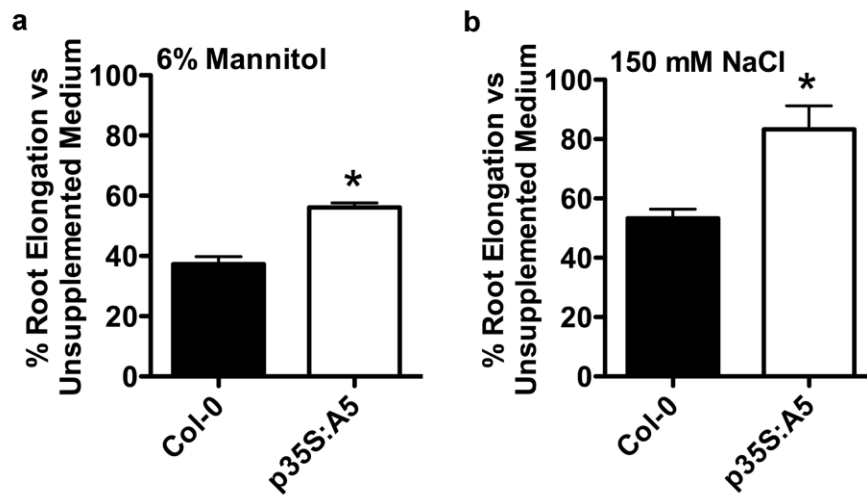

**Fig S5.** Abiotic stress responses of *p35S::NF-YA5* seedlings. Response to a) 6% mannitol b) 150 mM NaCl. Asterisks represent significant differences derived from Student's t-tests.

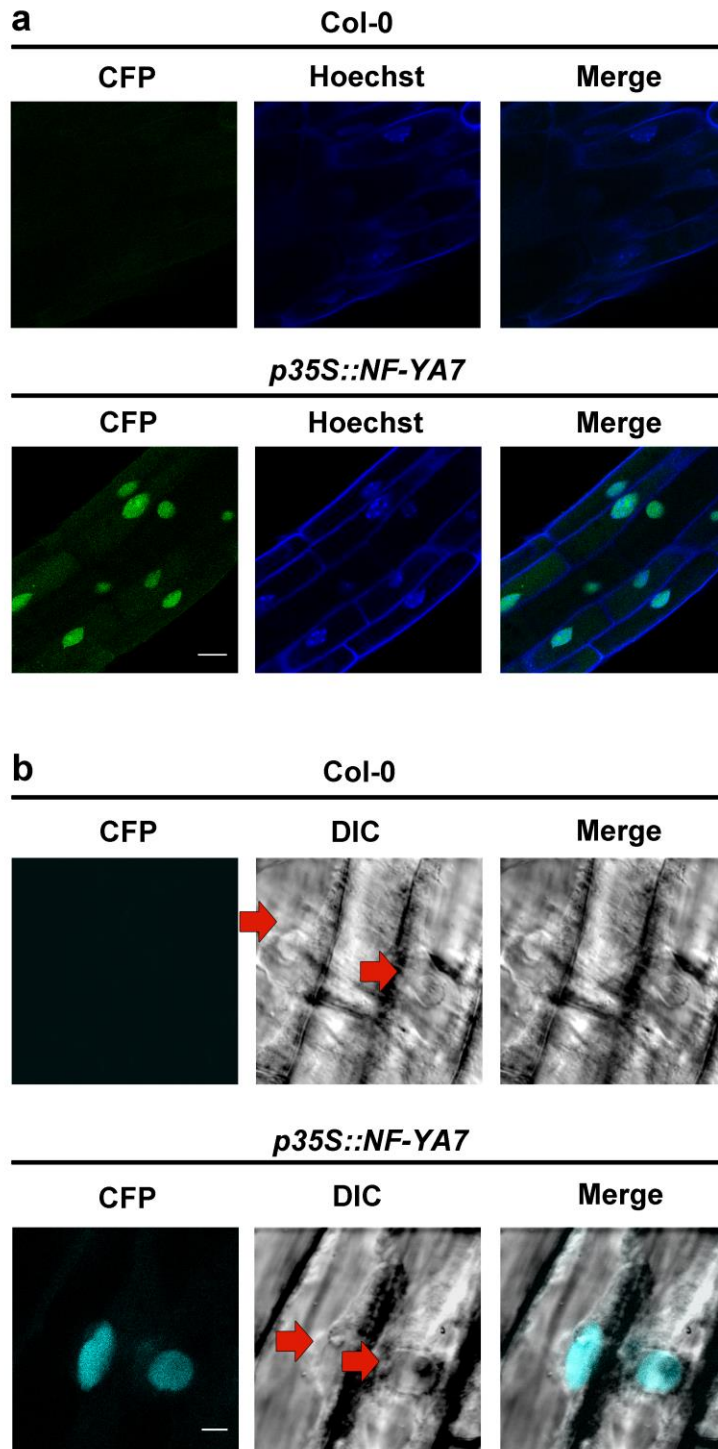

**Fig. S6** Confirmation of nuclear localization of NF-YA proteins. (a) Hoechst 33342 (blue) labels nuclei and CFP signal (green) shows localization of NF-YA7. Merged images demonstrate co-localization of DNA label and CFP fluorescence. Scale - 15  $\mu$ m. (b) Differential Interference Contrast (DIC) imaging (grey) of root cell nuclei (red arrows point to the nuclei) with CFP signal (cyan) showing localization of NF-YA7. Merged images indicate CFP fluorescence is localized to the root cell nuclei. Scale - 5  $\mu$ m.

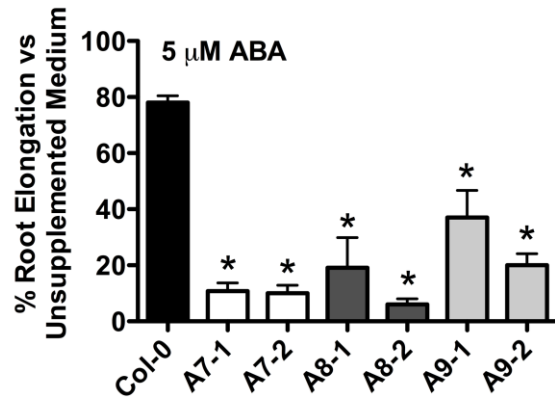

**Fig. S7** Overexpression of select *NF-YA* genes leads to ABA hypersensitivity during root elongation. The percent root elongation in growth medium with ABA was compared to the unsupplemented medium for Col-0, *p35S::NF-YA7*, *p35S::NF-YA8*, and *p35S::NF-YA9*. Asterisks represent significant differences derived from one-way ANOVA ( $P < 0.05$ ) followed by Dunnett's multiple comparison post hoc test against Col-0

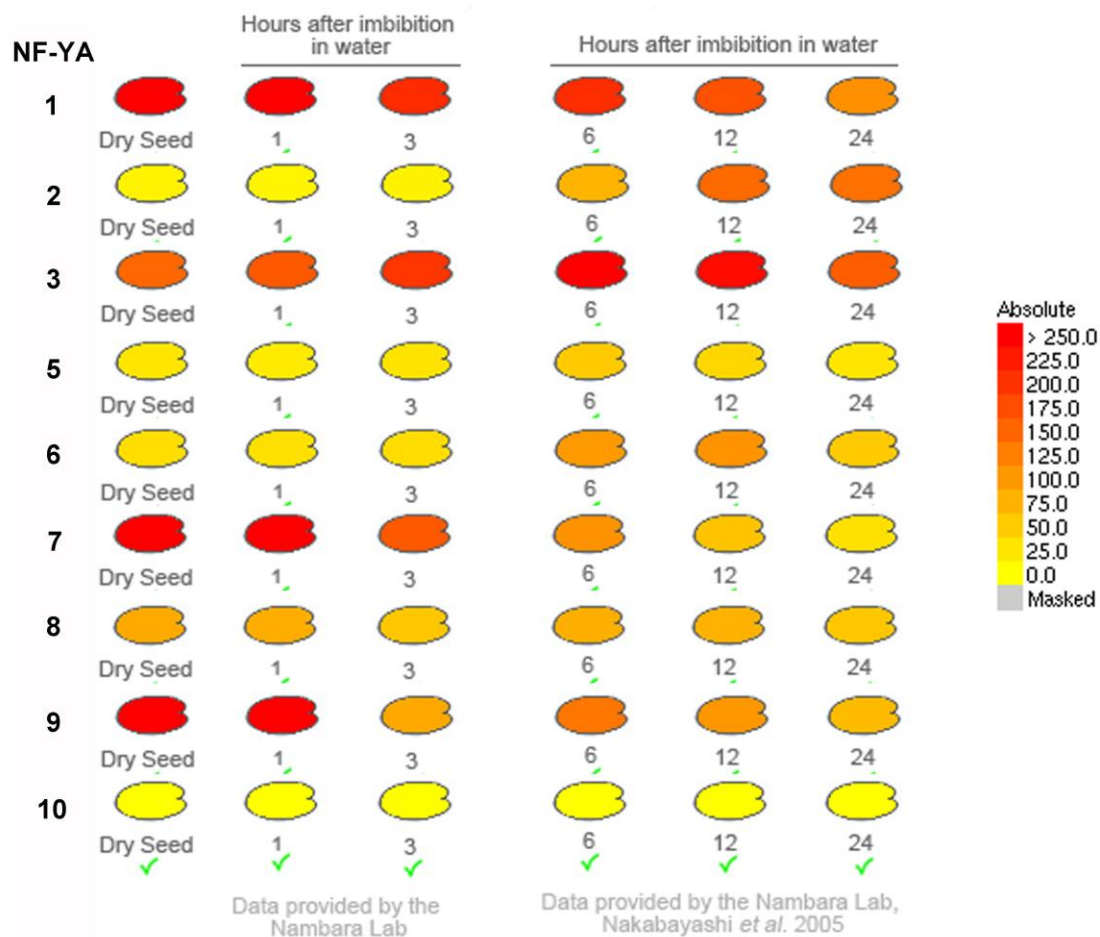

**Fig. S8** Publicly available microarray data demonstrate that *NF-YA* genes are expressed in seeds. Data was obtained from the Arabidopsis e-FP browser at <http://bar.utoronto.ca/efp/cgi-bin/efpWeb.cgi>.

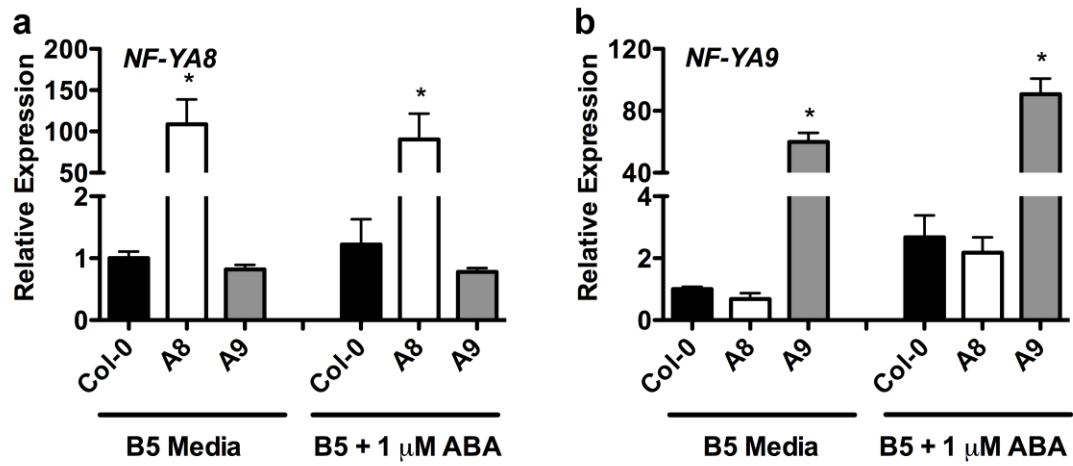

**Fig. S9** qPCR analysis of gene expression in *p35S::NF-YA8* and *p35S::NF-YA9* seeds. (A) *NF-YA8* (B) *NF-YA9*. Asterisks represent significant differences derived from two-way ANOVA ( $p < 0.05$ ), in which genotype and seed growth media are the two variables, followed by Bonferroni multiple comparisons post hoc test against Col-0 on B5 media or on B5 + 1  $\mu$ M ABA.

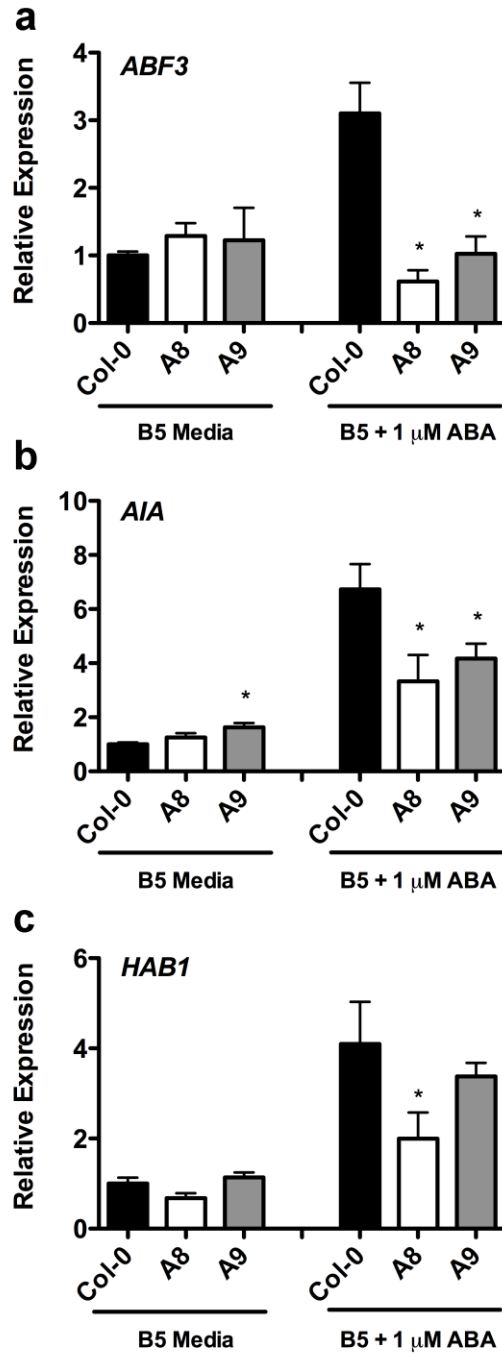

**Fig. S10** ABA-induction of gene expression in *p35S::NF-YA8* and *p35S::NF-YA9* seeds. Expression of (A) *ABF3* (B) *AIA* (C) *HAB1*. Asterisks represent significant differences derived from two-way ANOVA ( $p < 0.05$ ), in which genotype and seed growth media are the two variables, followed by Bonferroni multiple comparisons post hoc test against Col-0 on B5 media or B5 + 1  $\mu$ M ABA.
